# Supplementary material for: Long-term outcomes of peripheral blood stem cell unrelated donors mobilized with filgrastim
Source: PubMed Central journal article supplement — Blood Adv. 2024 May 3;8(15):4196–206. doi: 10.1182/bloodadvances.2024012646 (PMC11372396; doi:10.1182/bloodadvances.2024012646), 2024-05-03
Supplement: BLOODA_ADV-2024-012646-mmc1.pdf [file BLOODA_ADV-2024-012646-mmc1.pdf]

1 Supplemental Tables

2 Supplemental Table 1a. Demographic characteristics for PBSC donors, stratified by cohort

3

|                                                                             | <b>Prospective</b> | <b>Retrospective</b> |                |
|-----------------------------------------------------------------------------|--------------------|----------------------|----------------|
| <b>Variable</b>                                                             | <b>No. (%)</b>     | <b>No. (%)</b>       | <b>p-value</b> |
| Number of donors                                                            | 8760               | 5770                 |                |
| Number of filgrastim exposures – N (%)                                      |                    |                      |                |
| 1                                                                           | 8414 (96)          | 5165 (90)            |                |
| 2                                                                           | 193 (2)            | 223 (4)              |                |
| 3                                                                           | 1 (<1)             | 5 (<1)               |                |
| Number of both BM donations and filgrastim exposures <sup>a</sup> – No. (%) |                    |                      |                |
| 1 BM donation -1 filgrastim exposure                                        | 149 (2)            | 349 (6)              |                |
| 1 BM donation - 2 filgrastim exposures                                      | 1 (<1)             | 12 (<1)              |                |
| 2 BM donations -1 filgrastim exposure                                       | 2 (<1)             | 16 (<1)              |                |
| Sex – No. (%)                                                               |                    |                      | <0.001         |
| Female                                                                      | 3392 (39)          | 2583 (45)            |                |
| Male                                                                        | 5368 (61)          | 3187 (55)            |                |
| Race – No. (%)                                                              |                    |                      | <0.001         |
| White                                                                       | 6341 (72)          | 4639 (80)            |                |
| Hispanic                                                                    | 843 (10)           | 409 (7)              |                |
| Black                                                                       | 320 (4)            | 178 (3)              |                |
| Asian / Pacific Islander                                                    | 549 (6)            | 251 (4)              |                |
| Native American                                                             | 52 (1)             | 51 (1)               |                |
| Multiple races / Other                                                      | 624 (7)            | 224 (4)              |                |
| Unknown / Decline                                                           | 31 (<1)            | 18 (<1)              |                |
| Age at first filgrastim exposure, years – No. (%)                           |                    |                      | <0.001         |
| 18 to 29                                                                    | 4427 (51)          | 1469 (25)            |                |
| 30 to 39                                                                    | 2076 (24)          | 1795 (31)            |                |
| 40 to 49                                                                    | 1546 (18)          | 1685 (29)            |                |
| 50+                                                                         | 711 (8)            | 821 (14)             |                |
| Median (min-max)                                                            | 30 (18-62)         | 38 (18-62)           | <0.001         |
| Year of first filgrastim exposure – No. (%)                                 |                    |                      | <0.001         |
| 1999                                                                        | 0                  | 15 (<1)              |                |
| 2000                                                                        | 0                  | 137 (2)              |                |
| 2001                                                                        | 0                  | 195 (3)              |                |
| 2002                                                                        | 1 (<1)             | 316 (5)              |                |
| 2003                                                                        | 0                  | 466 (8)              |                |
| 2004                                                                        | 1 (<1)             | 452 (8)              |                |

|                                    |                |                 |        |
|------------------------------------|----------------|-----------------|--------|
| 2005                               | 2 (<1)         | 535 (9)         |        |
| 2006                               | 0              | 587 (10)        |        |
| 2007                               | 4 (<1)         | 648 (11)        |        |
| 2008                               | 3 (<1)         | 774 (13)        |        |
| 2009                               | 7 (<1)         | 843 (15)        |        |
| 2010                               | 259 (3)        | 742 (13)        |        |
| 2011                               | 1409 (16)      | 41 (1)          |        |
| 2012                               | 1762 (20)      | 10 (<1)         |        |
| 2013                               | 2010 (23)      | 0               |        |
| 2014                               | 1810 (21)      | 7 (<1)          |        |
| 2015                               | 1478 (17)      | 1 (<1)          |        |
| 2016                               | 14 (<1)        | 1 (<1)          |        |
| Median (min-max) follow-up - years | 5.0 (0.6-16.0) | 11.9 (0.6-20.2) | <0.001 |

4  
5 PBSC = peripheral blood stem cells; BM= bone marrow; No=number; min=minimum; max=maximum  
6 <sup>a</sup> X-Y lists the total number of BM donations followed by the total number of exposures to filgrastim.  
7

8 **Supplemental Table 1b. Demographic characteristics for BM donors, stratified by cohort**  
9

|                                                                             | <u>Prospective</u> | <u>Retrospective</u> |                |
|-----------------------------------------------------------------------------|--------------------|----------------------|----------------|
| <b>Variable</b>                                                             | <b>No. (%)</b>     | <b>No. (%)</b>       | <b>p-value</b> |
| Number of donors                                                            | 3028               | 4095                 |                |
| Number of BM donations – No. (%)                                            |                    |                      |                |
| 1                                                                           | 2882 (95)          | 3614 (88)            |                |
| 2                                                                           | 21 (1)             | 148 (4)              |                |
| 3                                                                           | 0                  | 12 (<1)              |                |
| Number of both BM donations and filgrastim exposures <sup>a</sup> – No. (%) |                    |                      |                |
| 1 BM donation – 1 filgrastim exposure                                       | 122 (4)            | 294 (7)              |                |
| 1 BM donation – 2 filgrastim exposures                                      | 1 (<1)             | 11 (<1)              |                |
| 2 BM donations – 1 filgrastim exposure                                      | 2 (<1)             | 16 (<1)              |                |
| Sex – No. (%)                                                               |                    |                      | 0.001          |
| Female                                                                      | 1230 (41)          | 1818 (44)            |                |
| Male                                                                        | 1798 (59)          | 2277 (56)            |                |
| Race – No (%)                                                               |                    |                      | <0.001         |
| White                                                                       | 1882 (62)          | 3188 (78)            |                |
| Hispanic                                                                    | 440 (15)           | 358 (9)              |                |
| Black                                                                       | 209 (7)            | 187 (5)              |                |
| Asian / Pacific Islander                                                    | 216 (7)            | 191 (5)              |                |
| Native American                                                             | 26 (1)             | 42 (1)               |                |

|                                             |                |                 |        |
|---------------------------------------------|----------------|-----------------|--------|
| Multiple races / Other                      | 251 (8)        | 109 (2)         |        |
| Unknown / Decline                           | 4 (<1)         | 20 (<1)         |        |
| Age at first BM collection, years – No. (%) |                |                 | <0.001 |
| 18 to 29                                    | 1528 (50)      | 1014 (25)       |        |
| 30 to 39                                    | 803 (27)       | 1383 (34)       |        |
| 40 to 49                                    | 515 (17)       | 1289 (31)       |        |
| 50+                                         | 182 (6)        | 409 (10)        |        |
| Median (min-max)                            | 30 (19-61)     | 38 (19-61)      | <0.001 |
| Year of first BM collection – No. (%)       |                |                 | <0.001 |
| 1989                                        | 0              | 1 (<1)          |        |
| 1990                                        | 0              | 4 (<1)          |        |
| 1991                                        | 0              | 3 (<1)          |        |
| 1992                                        | 1 (<1)         | 6 (<1)          |        |
| 1993                                        | 1 (<1)         | 18 (<1)         |        |
| 1994                                        | 0              | 9 (<1)          |        |
| 1995                                        | 0              | 10 (<1)         |        |
| 1996                                        | 3 (<1)         | 22 (1)          |        |
| 1997                                        | 2 (<1)         | 28 (1)          |        |
| 1998                                        | 4 (<1)         | 32 (1)          |        |
| 1999                                        | 0              | 281 (7)         |        |
| 2000                                        | 1 (<1)         | 491 (12)        |        |
| 2001                                        | 1 (<1)         | 434 (11)        |        |
| 2002                                        | 2 (<1)         | 455 (11)        |        |
| 2003                                        | 1 (<1)         | 374 (9)         |        |
| 2004                                        | 2 (<1)         | 305 (7)         |        |
| 2005                                        | 2 (<1)         | 241 (6)         |        |
| 2006                                        | 1 (<1)         | 271 (7)         |        |
| 2007                                        | 1 (<1)         | 275 (7)         |        |
| 2008                                        | 1 (<1)         | 279 (7)         |        |
| 2009                                        | 2 (<1)         | 295 (7)         |        |
| 2010                                        | 82 (3)         | 247 (6)         |        |
| 2011                                        | 499 (16)       | 11 (<1)         |        |
| 2012                                        | 654 (22)       | 2 (<1)          |        |
| 2013                                        | 655 (22)       | 1 (<1)          |        |
| 2014                                        | 625 (21)       | 0               |        |
| 2015                                        | 484 (16)       | 0               |        |
| 2016                                        | 4 (<1)         | 0               |        |
| Median (min-max) follow-up - years          | 5.0 (0.0-27.8) | 14.2 (0.0-29.2) | <0.001 |

10  
11

PBSC=peripheral blood stem cells; BM= bone marrow; No=number; min=minimum; max=maximum

12 <sup>a</sup> X-Y lists the total number of BM donations followed by the total number of exposures to filgrastim. Donors in the BM group who  
13 later had exposure to filgrastim were censored at the time of filgrastim exposure.  
14

15
